# Supplementary material for: Albumin-Based Nanoparticles for the Delivery of Doxorubicin in Breast Cancer
Source: MDPI journal article supplement (doi:10.3390/cancers13123011), 2021-06-16
Supplement: s1 [file s1]

Supplementary

# Albumin-Based Nanoparticles for the Delivery of Doxorubicin in Breast Cancer

Rama Prajapati, Eduardo G. Garrido and Álvaro Somoza\*

Instituto Madrileño de Estudios Avanzados en Nanociencia (IMDEA Nanociencia), Faraday 9, 28049 Madrid, Spain

\* Correspondence: e-mail alvaro.somoza@imdea.org; Tel.: +34-912-998-856

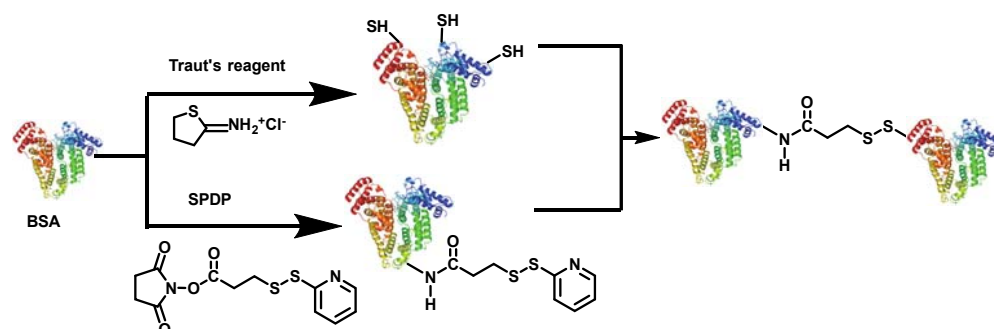

**Figure S1.** Surface modification of BSA with Traut's reagent and SPDP, followed by their conjugation through the formation of disulfide bonds to yield the corresponding BSA nanoparticles (ABN-SPDP). .

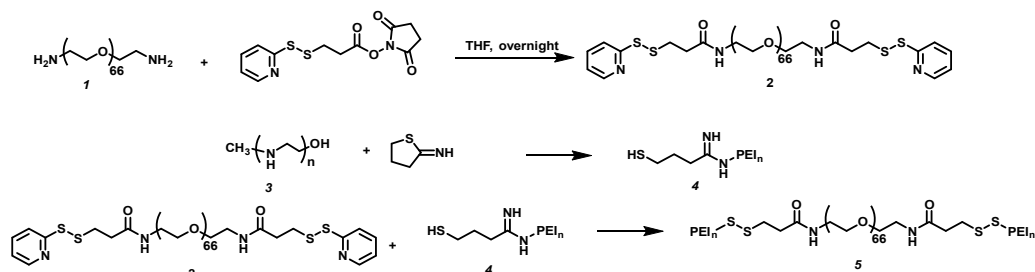

**Figure S2.** Schematic illustration of the preparation of PEI-PEG based polymer.

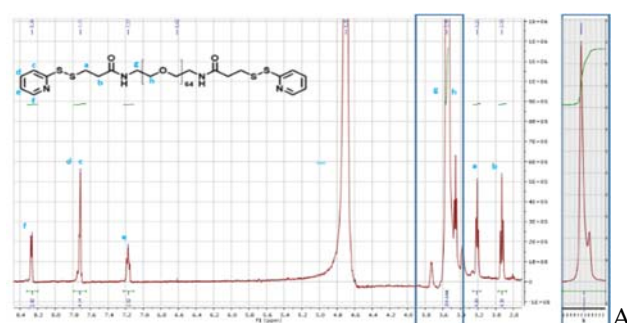

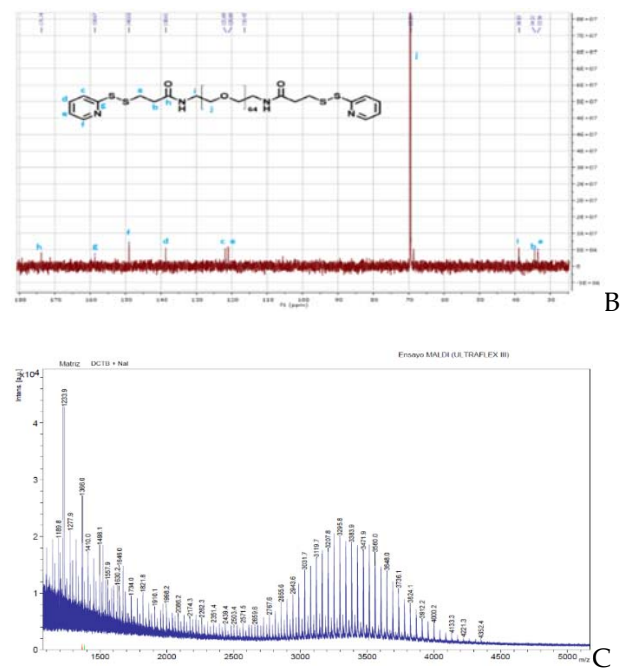

**Figure S3.**  $^1\text{H}$  (A)  $^{13}\text{C}$  NMR (B) and MS (C) of  $\text{NH}_2\text{-PEG-NH}_2$  modified with SPDP.

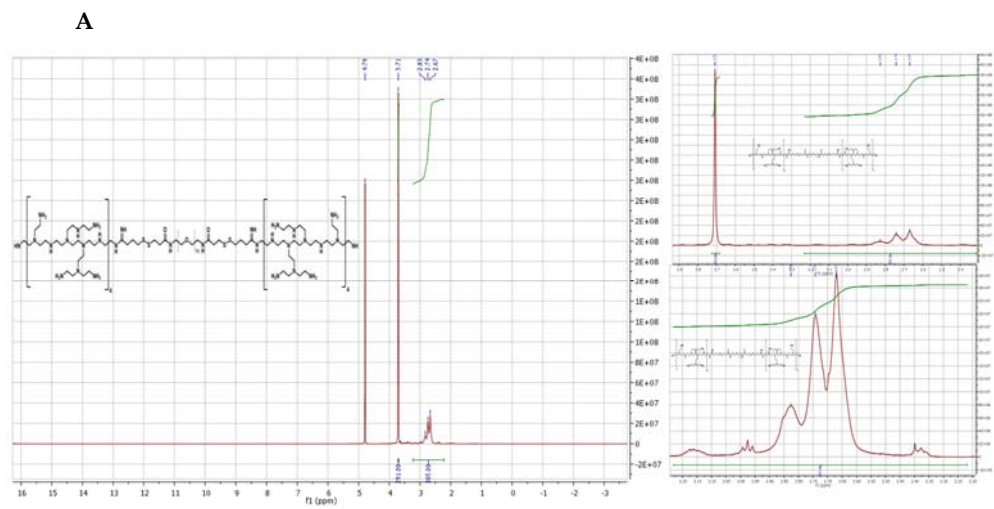

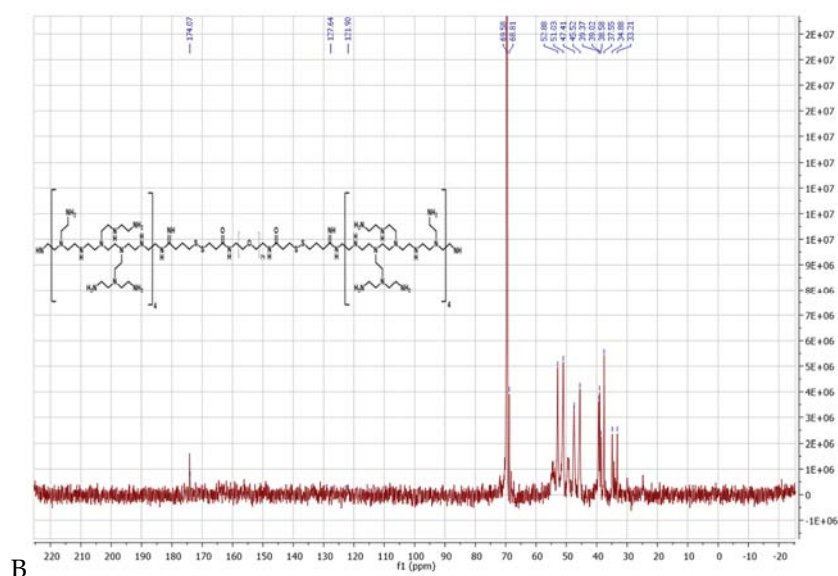

B

**Figure S4.**  $^1\text{H}$  (A) and  $^{13}\text{C}$  NMR (B) of PEI-PEG-PEI. In  $^1\text{H}$  NMR, the PEG/PEI signal integrates in the ratio of 1:1.05, which corresponds approximately to the bi-functionalized PEG with PEI. In  $^{13}\text{C}$  NMR, the characteristics peaks of the PEG at 70 ppm, and the peaks of PEI distributed between 50 and 35 ppm can be observed that correspond to the ethylene groups.

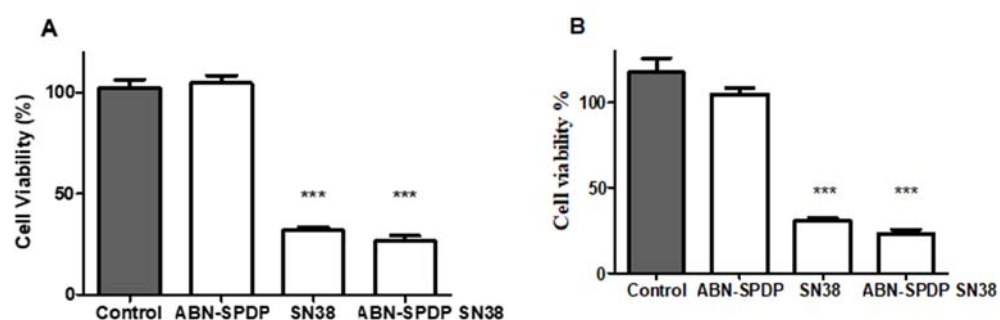

**Figure S5.** Cell viability assay with SN38 loaded ABN-SPDP in (A) MCF-7 and (B) MDA-MB-231 cells 48 hours post-treatment. Statistical analysis was performed using one-way ANOVA Tukey's test (\*\*\*)  $p$ -value < 0.0001).

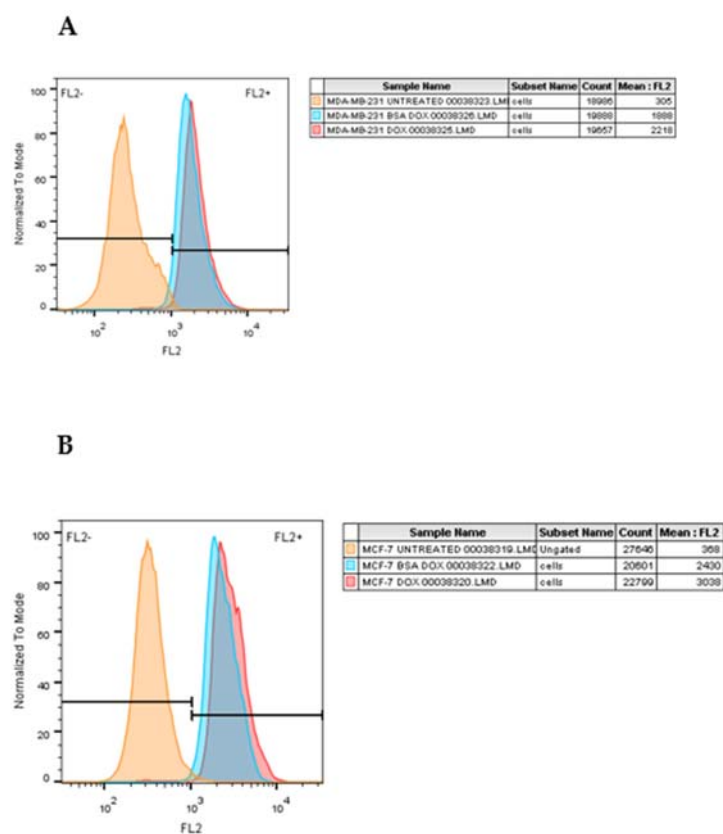

**Figure S6.** Quantification of fluorescence of Dox using flow cytometry in MDA-MB-231 (A) and MCF-7 (B) cells 24 hours post-treatment.

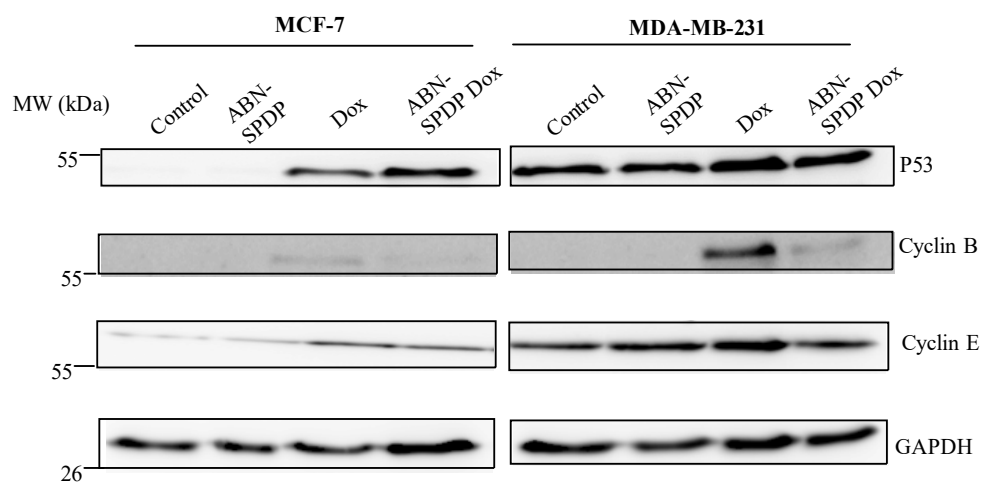

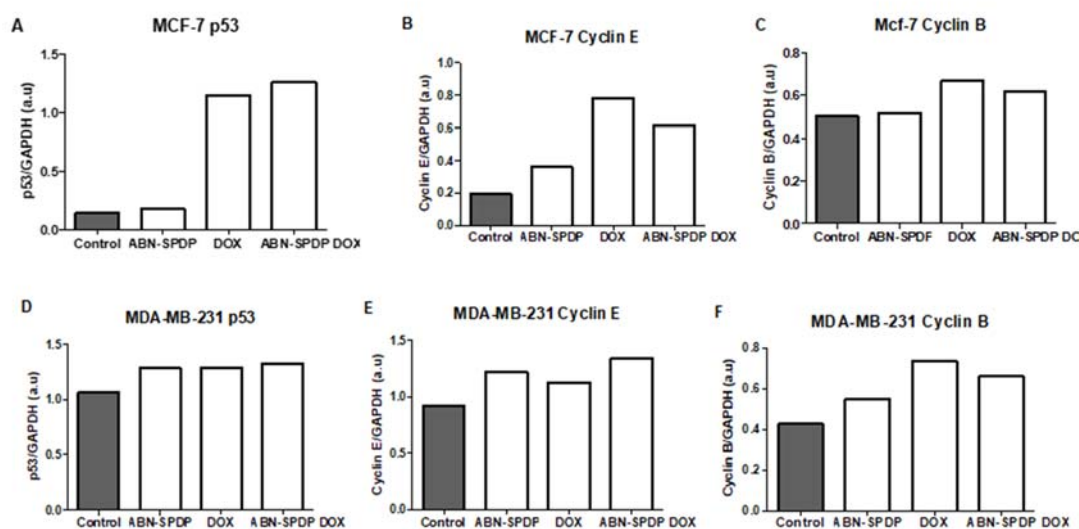

**Figure S7.** Western blot assay to assess the effect of Dox loaded ABN-SPDP on the expression of P53 and cyclins in MCF-7 and MDA-MB-231 cells.

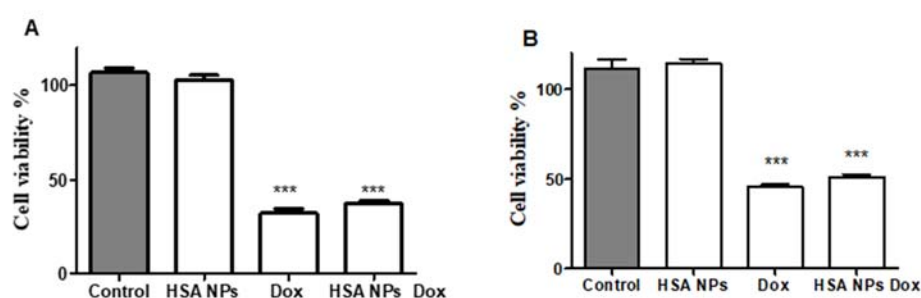

**Figure S8.** Cell viability assay with Dox loaded HSA NPs in (A) MCF-7 and (B) MDA-MB-231 cells 48 hours post-treatment. Statistical analysis was performed using one-way ANOVA Tukey's test (\*\*\*)  $p$ -value < 0.0001).

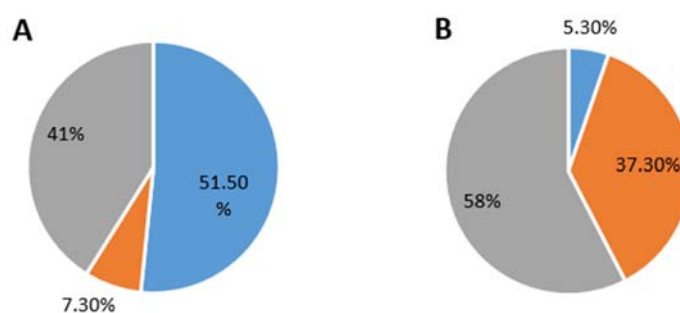

**Figure S9.** Percentage of cells in different phases of the cell cycle in (A) MCF-7 and (B) MDA-MB-231 cells treated with Dox-loaded HSA NPs. Blue: cells in G0/G1 phase; orange: cells in S phase; grey: cells in G2/M phase.
